# Supplementary material for: Variation in Cold-Related Mortality in England Since the Introduction of the Cold Weather Plan: Which Areas Have the Greatest Unmet Needs?
Source: MDPI journal article supplement (doi:10.3390/ijerph15112588), 2018-11-19
Supplement: s1 [file s1]

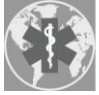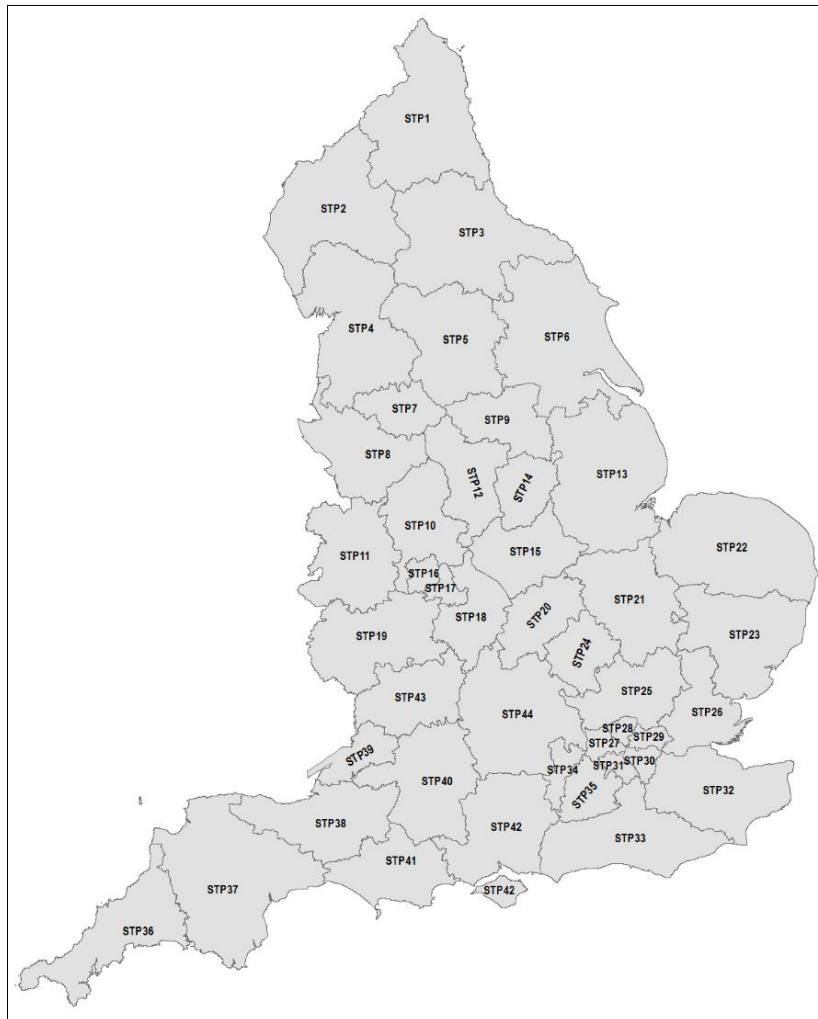

**Figure S1.** Size and location of the Sustainable and Transformation Partnerships in England.

**Table S1.** Distribution of daily mean temperatures at national and STP level, 2007-2015, mortality risk during winter months only (November–March); estimated by comparing temperature at 0 °C with temperature at 13 °C. The table also shows the fraction of wintertime deaths attributable to low temperatures (Population Attributable Fraction (PAF)).

| Sustainability Transformation Partnerships (STPs)             | Relative risk (95% CI)<br>2007–2015 | PAF   |
|---------------------------------------------------------------|-------------------------------------|-------|
| England                                                       | 1.25 (1.22–1.29)                    | 10.92 |
| Cambridgeshire and Peterborough                               | 1.12 (1.00–1.26)                    | 5.45  |
| Lincolnshire                                                  | 1.15 (1.03–1.30)                    | 7.43  |
| South Yorkshire and Bassetlaw                                 | 1.15 (1.06–1.25)                    | 7.1   |
| North East London                                             | 1.18 (1.07–1.30)                    | 6.96  |
| Norfolk and Waveney                                           | 1.19 (1.07–1.33)                    | 8.66  |
| Hertfordshire and West Essex                                  | 1.20 (1.09–1.31)                    | 8.88  |
| South West London                                             | 1.20 (1.09–1.33)                    | 8.54  |
| Durham, Darlington, Tees, Hambleton, Richmondshire and Whitby | 1.21 (1.10–1.33)                    | 10.13 |
| Nottinghamshire                                               | 1.21 (1.09–1.34)                    | 9.23  |
| Northumberland, Tyne and Wear                                 | 1.22 (1.12–1.33)                    | 11.12 |
| Lancashire and South Cumbria                                  | 1.23 (1.14–1.33)                    | 10.44 |
| West Yorkshire                                                | 1.23 (1.14–1.33)                    | 10.78 |
| Herefordshire and Worcestershire                              | 1.23 (1.10–1.38)                    | 9.62  |
| Milton Keynes, Bedfordshire and Luton                         | 1.23 (1.10–1.38)                    | 9.75  |
| Coast, Humber and Vale                                        | 1.23 (1.13–1.34)                    | 10.6  |
| Cheshire and Merseyside                                       | 1.23 (1.16–1.32)                    | 10.13 |
| Kent and Medway                                               | 1.24 (1.14–1.35)                    | 9.73  |
| South East London                                             | 1.24 (1.12–1.36)                    | 9.22  |
| Buckinghamshire, Oxfordshire and Berkshire West               | 1.24 (1.13–1.35)                    | 10.06 |
| Bath, Swindon and Wiltshire                                   | 1.26 (1.12–1.41)                    | 10.87 |
| Leicester, Leicestershire and Rutland                         | 1.26 (1.13–1.40)                    | 11.09 |
| Gloucestershire                                               | 1.26 (1.12–1.43)                    | 10.85 |
| Sussex and East Surrey                                        | 1.27 (1.18–1.37)                    | 10.88 |
| North West London                                             | 1.28 (1.16–1.40)                    | 10.9  |
| Surrey Heartlands                                             | 1.28 (1.14–1.44)                    | 11.06 |
| Devon                                                         | 1.29 (1.17–1.43)                    | 11.37 |
| West, North and East Cumbria                                  | 1.29 (1.10–1.51)                    | 12.98 |
| Greater Manchester                                            | 1.29 (1.20–1.38)                    | 12.36 |
| North Central London                                          | 1.30 (1.17–1.45)                    | 11.54 |
| Staffordshire                                                 | 1.30 (1.17–1.43)                    | 13.21 |
| Frimley Health                                                | 1.30 (1.13–1.49)                    | 11.76 |
| Coventry and Warwickshire                                     | 1.30 (1.17–1.45)                    | 12.32 |
| Shropshire and Telford and Wrekin                             | 1.32 (1.15–1.51)                    | 12.88 |
| The Black Country                                             | 1.33 (1.22–1.46)                    | 13.69 |
| Suffolk and North East Essex                                  | 1.33 (1.20–1.47)                    | 13.61 |
| Birmingham and Solihull                                       | 1.33 (1.21–1.47)                    | 13.64 |
| Derbyshire                                                    | 1.33 (1.21–1.48)                    | 14.24 |
| Hampshire and the Isle of Wight                               | 1.34 (1.24–1.45)                    | 12.99 |
| Dorset                                                        | 1.35 (1.20–1.52)                    | 12.42 |
| Bristol, North Somerset and South Gloucestershire             | 1.35 (1.21–1.52)                    | 13.57 |
| Northamptonshire                                              | 1.38 (1.22–1.55)                    | 14.88 |
| Mid and South Essex                                           | 1.38 (1.26–1.52)                    | 14.76 |
| Somerset                                                      | 1.52 (1.32–1.75)                    | 18.68 |
| Cornwall and the Isles of Scilly                              | 1.57 (1.35–1.81)                    | 17.87 |

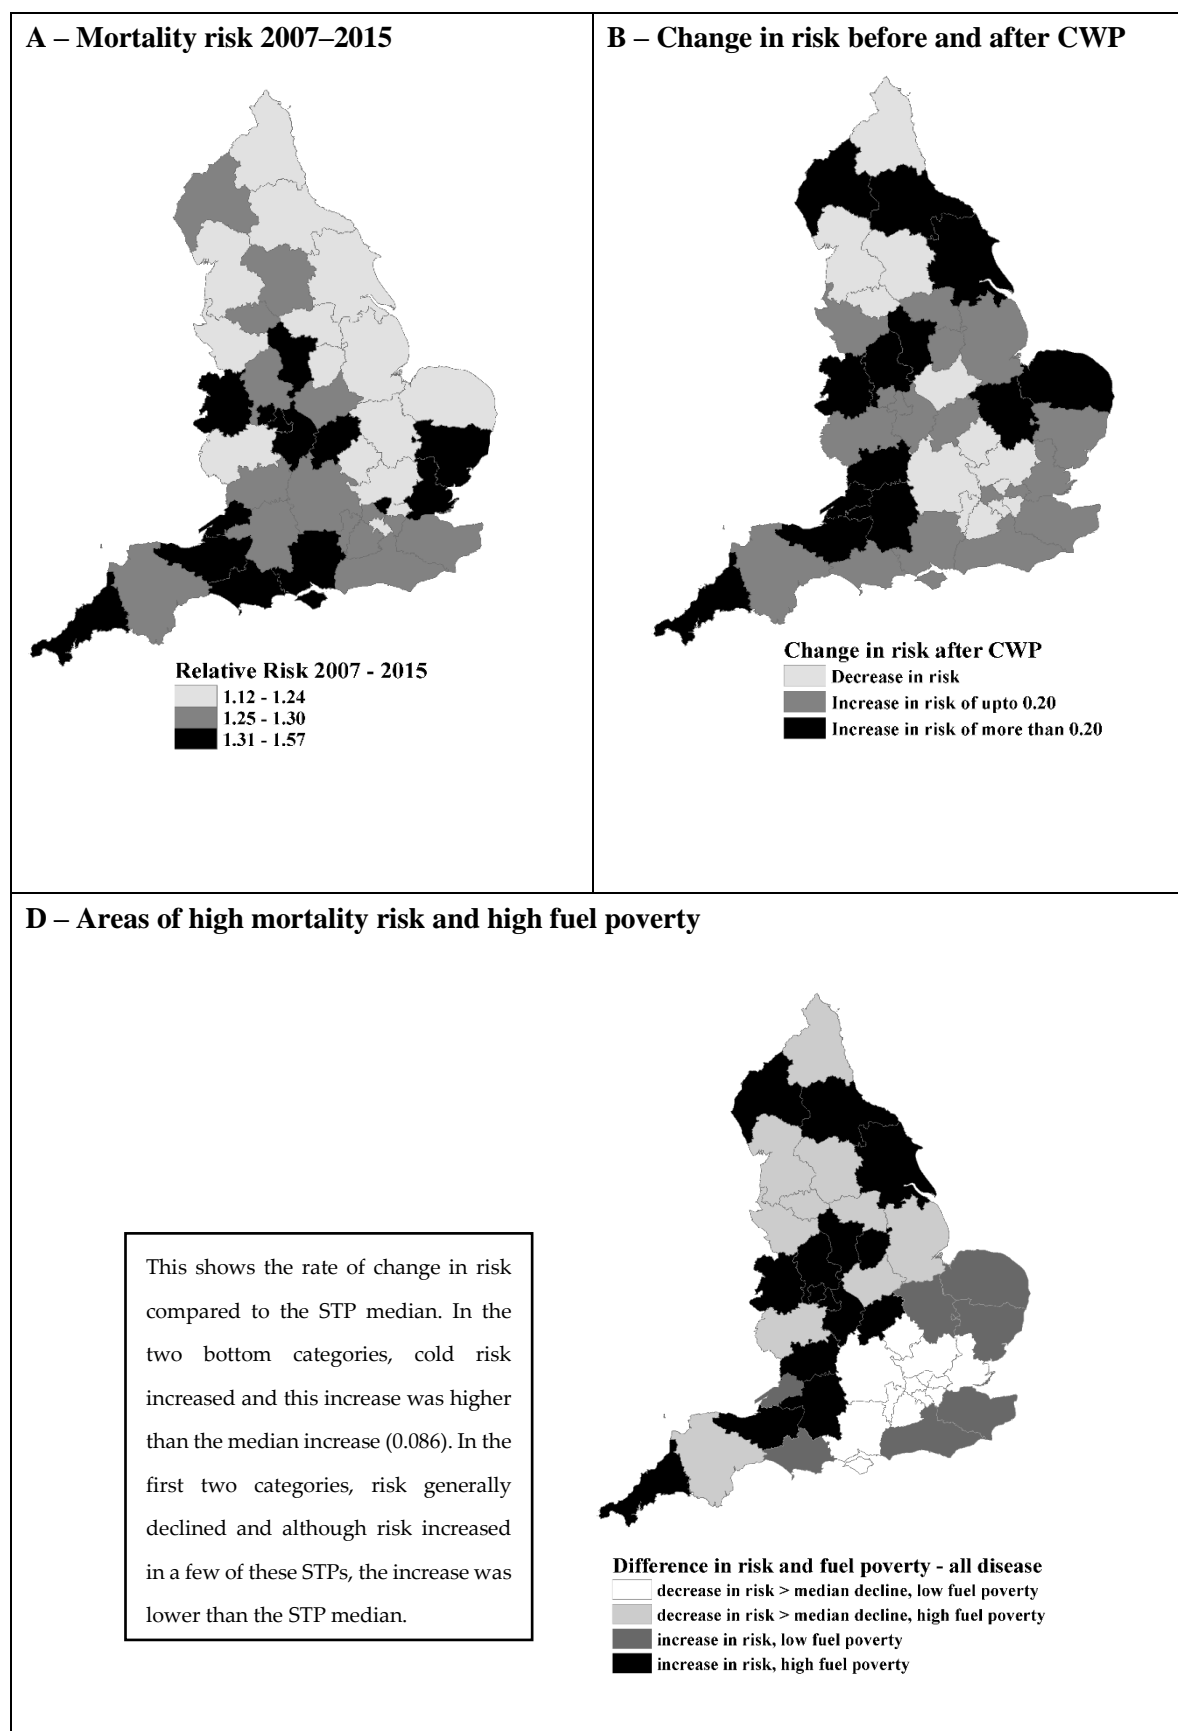

**Figure S2.** (A) the area distribution of mortality risk during 2007–2010, (B) the change in mortality risk between 2007–2010 and 2011–2015, and (D) areas of unmet need.
